# Supplementary material for: Circulating and disseminated tumor cells from breast cancer patient-derived xenograft-bearing mice as a novel model to study metastasis
Source: Breast Cancer Res. 2015 Jan 9;17(1):3. doi: 10.1186/s13058-014-0508-5 (PMC4318479; doi:10.1186/s13058-014-0508-5)
Supplement: Additional file 1: Table S1. — Individual mouse data for CTCs and BM-DTCs for all PDX lines screened. [file 13058_2014_508_MOESM1_ESM.xls]

## Sheet: Foglio1
Additional file 1: Table S1.
PDX Line	Lung Metastases	Mouse ID	Transplant generation	CTCs per 20,000 nucleated cells (?20 ?l of blood)	CTC clusters	BM-DTCs per 2 million BM cells	BM-DTC clusters
BCM-3107	No	2411	9	0	No	NA	NA
		2575	9	0	No	NA	NA
		2957	10	7	No	1	No
		2958	10	0	No	0	No
BCM-3143	No	139	5	0	No	0	No
		140	6	0	No	0	No
BCM-3204	Yes	465	10	3	No	NA	NA
		467	10	NA	No	0	No
		2573	8	0	No	NA	NA
		2574	8	0	No	NA	NA
		No tag	8	43	Yes	0	No
BCM-3561	No	2728	9	0	No	NA	NA
		2729	9	1	No	NA	NA
		2763	9	1	No	NA	NA
		2764	9	0	No	NA	NA
BCM-3613	Yes	463	9	0	No	NA	NA
		2432	8	7	No	0	No
		2970	9	0	No	0	No
BCM-3807	No	416	11	0	No	NA	NA
		643	5	NA	NA	29	No
		645	5	0	No	0	No
		2559	11	0	No	NA	NA
		2560	11	0	No	NA	NA
BCM-3887	Yes	2102	5	NA	NA	0	No
		2103	5	53	Yes	0	No
		3923	5	92	Yes	0	No
		3924	5	3	Yes	0	No
		No tag	5	0	No	<1	No
BCM-3963	Yes	8	5	0	No	0	No
		9	5	0	No	NA	NA
		13	5	0	No	NA	NA
		39	5	0	No	NA	NA
		47	5	0	No	0	No
		489	5	7	No	0	No
BCM-4195	No	9172	10	0	No	0	No
		9175	10	0	No	0	No
BCM-4272	Yes	11	8	NA	NA	1	No
		12	8	NA	NA	<1	No
		13	8	NA	NA	0	No
		211	8	3	No	0	No
		229	8	2	No	11	No
		2952	6	25	No	132	Yes
BCM-4664	No	2544	4	0	No	NA	NA
		2545	4	0	No	NA	NA
		2550	4	2	No	NA	NA
BCM-4888	Yes	3917	10	4	No	0	No
		3918	10	28	Yes	NA	NA
		3919	10	3	No	0	No
		3920	10	8	Yes	0	No
		3922	10	7	No	0	No
BCM-5097	Yes	2442	3	0	No	0	No
		2443	3	0	No	NA	NA
		2444	3	10	No	12	No
		2445	3	91	Yes	35	No
		2471	4	0	No	0	No
		2587	4	10	Yes	30	No
BCM-5156	No	2092	10	NA	NA	0	No
		2421	3	0	No	NA	NA
		2595	2	0	No	NA	NA
		2792	2	15	No	NA	NA
		2930	4	28	No	2	No
		6250	3	1	No	NA	NA
BCM-5438	No	2572	2	2	No	67	No
		2994	3	3	No	4	No
BCM-5471	Yes	2089	10	0	No	0	No
		2090	10	0	No	0	No
		2091	10	2	No	<1	Yes
		2422	3	0	No	NA	NA
		2423	3	1	No	NA	NA
		2934	4	10	Yes	6	No
BCM-5998	No	2908	2	0	No	0	No
		2912	2	0	No	0	No
		2913	2	27	No	0	No
		2915	2	0	No	2	No
		3902	3	<1	No	2	No
		3903	3	3	No	2	No
		3974	3	NA	NA	1	No
		3975	3	<1	No	11	Yes
BCM-6257	Yes	2698	3	80	Yes	9	No
		3937	2	3	Yes	0	No
		3938	2	3	Yes	39	Yes
NA- not available
